# Supplementary material
Source: publisher site journal article supplement (https://www.dovepress.com/article/239507)
Supplement: Supplementary file 1 [file get_supplementary_file.php]

*Supplementary Materials*

**Treatment Effectiveness Assessment**

The TEA asks you about how you are doing in four areas that are important in your treatment and recovery: Substance Use, Health, Lifestyle, and Community. Think about how things are for you in those areas and circle the number that best describes your situation, from 1 (not well at all) to 10 (extremely well). In the Remarks section of each category, please write down one or two comments about what you thought was important in how you responded on the scales. Feel free to add details or more information about your responses and your remarks.

| **Substance Use**: **How are you doing with substance use?** Consider the frequency and amount of use, money spent on drugs and alcohol, amount of drug craving, time spent being high/drunk, being sick, in trouble, and in other drug-using activities, etc.  *Not well at all ………………………….Fair……………………………Extremely well*  1 2 3 4 5 6 7 8 9 10  *Remarks*: |
| --- |
| **Health**: **How are you doing with your health?** Think about your physical and mental health: Are you eating and sleeping properly, exercising, taking care of health problems or dental problems, feeling better about yourself, etc.?  *Not well at all …………………………Fair ……………………………Extremely well*  1 2 3 4 5 6 7 8 9 10  *Remarks:* |
| **Lifestyle**: **How are you doing in terms of your personal responsibilities?** Think about your living conditions, family situation, employment, relationships: Are you paying your bills? Following through with your personal or professional commitments?  *Not well at all ………………………….Fair……………………………Extremely well*  1 2 3 4 5 6 7 8 9 10  *Remarks*: |
| **Community: How are you doing in the community?** Think about things like obeying laws and meeting your responsibilities to society: Do your actions have positive or negative impacts on other people?  *Not well at all ………………………….Fair……………………………Extremely well*  1 2 3 4 5 6 7 8 9 10  *Remarks*: |

***Name: Date:***
